# Supplementary material
Source: publisher figshare collection journal article supplement (https://asha.figshare.com/articles/dataset/_/14143910)
Supplement: Supplementary file 2 [file 1]

**Supplemental Material S1. Teachers survey: sections related to this study.**

*Eligibility questions to be answered prior to progressing into survey*

1. Are you a teacher?

- ☐ Yes
- ☐ No

*(If 'No' is selected the following message will be displayed and the survey will end)*

Thank you for your willingness to participate in this survey. If you are not a teacher but have an interest in participating in this study, please contact the researcher at [mzah253@aucklanduni.ac.nz](mailto:mzah253@aucklanduni.ac.nz).

2. Are you currently teaching in the Maldives?

- ☐ Yes
- ☐ No

*(If 'No' is selected the following message will be displayed and the survey will end)*

Thank you for your willingness to participate in this survey. If you are not currently teaching in the Maldives but have an interest in participating in this study, please contact the researcher at [mzah253@aucklanduni.ac.nz](mailto:mzah253@aucklanduni.ac.nz).

3. Are you teaching children between the ages of 0-16years?

- ☐ Yes
- ☐ No

*(If 'No' is selected the following message will be displayed and the survey will end)*

Thank you for your willingness to participate in this survey. If you are not currently teaching children between 0-16 years of age but have an interest in participating in this study, please contact the researcher at [mzah253@aucklanduni.ac.nz](mailto:mzah253@aucklanduni.ac.nz).

*The following questions are to gain a little more information about you, to help us learn a bit more about your situation.*

1. How frequently do you use the following types of technology in your personal life?

|                                                           | Every day or almost everyday | A few times a week    | Once a week           | 1-3 times a month     | Not at all            |
|-----------------------------------------------------------|------------------------------|-----------------------|-----------------------|-----------------------|-----------------------|
| Internet                                                  | <input type="radio"/>        | <input type="radio"/> | <input type="radio"/> | <input type="radio"/> | <input type="radio"/> |
| Computers/laptops                                         | <input type="radio"/>        | <input type="radio"/> | <input type="radio"/> | <input type="radio"/> | <input type="radio"/> |
| Tablets (e.g. iPad)                                       | <input type="radio"/>        | <input type="radio"/> | <input type="radio"/> | <input type="radio"/> | <input type="radio"/> |
| Smart phones with internet and video calling capabilities | <input type="radio"/>        | <input type="radio"/> | <input type="radio"/> | <input type="radio"/> | <input type="radio"/> |
| Phones without internet or video calling capabilities     | <input type="radio"/>        | <input type="radio"/> | <input type="radio"/> | <input type="radio"/> | <input type="radio"/> |

2. How confident are you with using the following types of technology in your personal life? *(only statements where anything other than 'Not at all' was selected in the previous question will be displayed)*

|                                                           | Very Confident        | Moderately confident  | Slightly confident    | Not confident at all  |
|-----------------------------------------------------------|-----------------------|-----------------------|-----------------------|-----------------------|
| Internet                                                  | <input type="radio"/> | <input type="radio"/> | <input type="radio"/> | <input type="radio"/> |
| Computers/laptops                                         | <input type="radio"/> | <input type="radio"/> | <input type="radio"/> | <input type="radio"/> |
| Tablets (e.g. iPad)                                       | <input type="radio"/> | <input type="radio"/> | <input type="radio"/> | <input type="radio"/> |
| Smart phones with internet and video calling capabilities | <input type="radio"/> | <input type="radio"/> | <input type="radio"/> | <input type="radio"/> |
| Phones without internet or video calling capabilities     | <input type="radio"/> | <input type="radio"/> | <input type="radio"/> | <input type="radio"/> |

*The following questions relate to various types of technology you may have available at your school.*

3. Can you access any of the following at your school for use with your class or individual children?

|                                                              | Yes<br>Available/accessible in<br>classroom | Yes<br>But only available in<br>some rooms in our<br>school | No<br>No access at all<br>in my school |
|--------------------------------------------------------------|---------------------------------------------|-------------------------------------------------------------|----------------------------------------|
| Internet                                                     | <input type="radio"/>                       | <input type="radio"/>                                       | <input type="radio"/>                  |
| Computers/laptops                                            | <input type="radio"/>                       | <input type="radio"/>                                       | <input type="radio"/>                  |
| Tablets (e.g. iPad)                                          | <input type="radio"/>                       | <input type="radio"/>                                       | <input type="radio"/>                  |
| Smart phones with internet and<br>video calling capabilities | <input type="radio"/>                       | <input type="radio"/>                                       | <input type="radio"/>                  |
| Phones without internet or video<br>calling capabilities     | <input type="radio"/>                       | <input type="radio"/>                                       | <input type="radio"/>                  |

4. How would you rate the following aspects of the internet you receive at school? *(displayed if either of the 'Yes' options is selected for internet access at school in the previous question)*

|                                                                                 | Very good             | Good                  | Variable              | Poor                  | Very poor             |
|---------------------------------------------------------------------------------|-----------------------|-----------------------|-----------------------|-----------------------|-----------------------|
| Speed (e.g. how fast<br>you are able to load<br>webpages, watch<br>videos etc.) | <input type="radio"/> |
| Reliability (e.g.<br>whether you have<br>frequent service<br>interruptions)     | <input type="radio"/> |

5. Is there a person/people available in your school to help solve problems with internet and other Information and Communication Technologies (e.g. computers, laptops, tablets, smartphones etc.)? *(displayed if either of the 'Yes' options is selected for any statements in question 10)*
- Yes
  - No
  - Unsure

6. How frequently have you used the following at school with your class or children? *(only the statements where either of the 'Yes' options was selected in question 10 will be displayed)*

|                                                                 | Every day or<br>almost everyday | A few times a<br>week | Once a week | 1-3 times a<br>month | Not at all |
|-----------------------------------------------------------------|---------------------------------|-----------------------|-------------|----------------------|------------|
| Internet                                                        | 0                               | 0                     | 0           | 0                    | 0          |
| Computers/laptops                                               | 0                               | 0                     | 0           | 0                    | 0          |
| Tablets (e.g. iPad)                                             | 0                               | 0                     | 0           | 0                    | 0          |
| Smart phones with<br>internet and video<br>calling capabilities | 0                               | 0                     | 0           | 0                    | 0          |
| Phones without<br>internet or video calling<br>capabilities     | 0                               | 0                     | 0           | 0                    | 0          |

7. For what purposes do you use the internet and devices (e.g. smartphones, tablets, computers etc.) in your school or classroom? Please select all that apply. *(Displayed if either of the 'Yes' options is selected for any statements in question 10 AND if anything other than 'not at all' is selected for internet and other devices in the previous question)*

- To access and create resources to use in my classroom or school
  - From sources within the Maldives
  - From sources outside of the Maldives
- For my own professional development e.g. access online courses
  - From sources within the Maldives
  - From sources outside of the Maldives
- To access information or advice about classroom management, special needs or learning difficulties in children.
  - From sources within the Maldives
  - From sources outside of the Maldives

To communicate with others about school related issues using:

- Emails
  - To people within the Maldives
  - To people outside of the Maldives
- instant messaging (e.g. Viber)
  - To people within the Maldives
  - To people outside of the Maldives
- video calls (e.g. skype)
  - To people within the Maldives
  - To people outside of the Maldives
- other means of communication (please specify\_\_\_\_\_)

To connect with the following professionals to support children in my class:

- Doctors/nurses
  - Within the Maldives
  - Outside of the Maldives
- Special education teachers
  - Within the Maldives
  - Outside of the Maldives
- Therapists (please specify \_\_\_\_\_)
  - Within the Maldives
  - Outside of the Maldives
- Other (please specify \_\_\_\_\_)
- Other purposes (please specify \_\_\_\_\_)

8. For which of the following purposes would you like to use internet and devices (e.g. smartphones, tablets, computers etc.) in your school or classroom? Please select all that apply (*Displayed if 'No' is selected for access to all devices and internet in question 10 OR if 'not at all' is selected for internet and other devices in the question 13*)

- To access and create resources to use in my classroom or school
- For my own professional development e.g. access online courses
- To access information or advice about classroom management, special needs or learning difficulties in children

To communicate with others about school related issues using:

- emails,
- instant messaging (e.g. Viber)
- video calls (e.g. skype)
- other means of communication (please specify\_\_\_\_\_)

To connect with the following professionals to support children in my class:

- Doctors/nurses
- Special education teachers
- Therapists (please specify \_\_\_\_\_)
- Other (please specify \_\_\_\_\_)
- Other purposes (please specify \_\_\_\_\_)
